# Supplementary material for: Mondo/ChREBP-Mlx-Regulated Transcriptional Network Is Essential for Dietary Sugar Tolerance in Drosophila
Source: PubMed Central journal article supplement (PMC3616910; doi:10.1371/journal.pgen.1003438), 2013-04-04
Supplement: pgen.1003438.s007.pdf [file pgen.1003438.s007.pdf]

**Supplemental table 1.**

| ProbeID      | EntrezGeneID | GeneSymbol | logFC | P.Value  | adj.P.Val |
|--------------|--------------|------------|-------|----------|-----------|
| A_09_P072311 | 43293        | mlx        | -4.44 | 3.85e-06 | 0.00392   |
| A_09_P056476 | 33224        | cbt        | -4.02 | 3.24e-06 | 0.00388   |
| A_09_P072306 | 43292        | CG3368     | -3.93 | 9.48e-07 | 0.00273   |
| A_09_P024801 | 35687        | CG1600     | -3.75 | 4.29e-05 | 0.0159    |
| A_09_P020546 | 34086        | CG7231     | -3.74 | 2.05e-07 | 0.00112   |
| A_09_P018321 | 33348        | mRpL48     | -3.7  | 3.26e-06 | 0.00388   |
| A_09_P005646 | 35946        | Cyp4p2     | -3.57 | 1e-06    | 0.00273   |
| A_09_P063236 | 50082        | CG3348     | -3.52 | 1.73e-06 | 0.00344   |
| A_09_P018531 | 33421        | CG3609     | -3.27 | 1.72e-05 | 0.00972   |
| A_09_P061061 | 43512        | CG12068    | -3.05 | 0.000105 | 0.0232    |
| A_09_P188560 | 318935       | CG31775    | -3.01 | 0.000386 | 0.0441    |
| A_09_P021726 | 34471        | CG17108    | -2.89 | 0.000137 | 0.0253    |
| A_09_P068256 | 31779        | CG15347    | -2.88 | 1.89e-05 | 0.0101    |
| A_09_P008501 | 36891        | CG6426     | -2.78 | 4.91e-05 | 0.0165    |
| A_09_P047741 | 4379870      | CG34141    | -2.71 | 4.26e-06 | 0.00404   |
| A_09_P032266 | 44381        | Tim17b2    | -2.7  | 6.1e-05  | 0.0183    |
| A_09_P003676 | 5740866      | CG34301    | -2.67 | 1.15e-05 | 0.00719   |
| A_09_P108115 | 32696        | Arpc3B     | -2.65 | 0.00037  | 0.0432    |
| A_09_P103970 | 46017        | I(2)01289  | -2.55 | 4.33e-05 | 0.0159    |
| A_09_P079021 | 35139        | CG17322    | -2.47 | 2.64e-06 | 0.00371   |
| A_09_P144790 | 33824        | Gpdh       | -2.46 | 1.18e-05 | 0.00724   |
| A_09_P209885 | 5740446      | Rgk3       | -2.43 | 4.71e-05 | 0.0163    |
| A_09_P192980 | 32924        | CG8034     | -2.33 | 2.23e-05 | 0.0109    |
| A_09_P068861 | 42211        | CG7675     | -2.32 | 0.000112 | 0.0232    |
| A_09_P003006 | 5740685      | CG34165    | -2.24 | 5.7e-05  | 0.0179    |
| A_09_P008941 | 37053        | CG5773     | -2.23 | 5.23e-05 | 0.0171    |
| A_09_P060741 | 43419        | CG14519    | -2.23 | 0.000175 | 0.0279    |
| A_09_P011751 | 43814        | bt         | -2.22 | 6.26e-06 | 0.00515   |
| A_09_P167600 | 35790        | Lpin       | -2.18 | 0.00045  | 0.0482    |
| A_09_P136070 | 326329       | CG33199    | -2.17 | 0.000144 | 0.0259    |
| A_09_P005567 | 35919        | CG13741    | -2.12 | 8.7e-05  | 0.0212    |
| A_09_P101715 | 5740644      | CG34288    | -2.1  | 2.22e-05 | 0.0109    |
| A_09_P011846 | 45396        | E5         | -2.09 | 0.000136 | 0.0253    |
| A_09_P150455 | 43616        | aralar1    | -2.04 | 4.98e-05 | 0.0166    |
| A_09_P020151 | 33955        | CG11236    | -2.04 | 4.28e-05 | 0.0159    |
| A_09_P025361 | 35898        | CG8229     | -2.04 | 0.000106 | 0.0232    |
| A_09_P022806 | 35003        | CG13277    | -2.01 | 1.1e-07  | 0.00112   |
| A_09_P078731 | 42849        | CG5991     | -1.97 | 0.000135 | 0.0253    |
| A_09_P073236 | 41198        | CG12946    | -1.97 | 0.000412 | 0.0461    |
| A_09_P064541 | 317813       | CG18789    | -1.96 | 4.57e-05 | 0.0161    |
| A_09_P221345 | 37116        | Dp1        | -1.96 | 4e-06    | 0.00396   |
| A_09_P124315 | 36532        | CG6357     | -1.94 | 6.83e-05 | 0.0193    |
| A_09_P043201 | 35184        | Lim3       | -1.93 | 3.76e-06 | 0.00392   |
| A_09_P220650 | 39084        | CG3982     | -1.92 | 0.000126 | 0.0246    |
| A_09_P168970 | 117369       | desat1     | -1.91 | 4.7e-05  | 0.0163    |
| A_09_P058541 | 246627       | CG30463    | -1.88 | 6.53e-05 | 0.0188    |
| A_09_P128570 | 50300        | CG13315    | -1.87 | 7.21e-05 | 0.0198    |
| A_09_P007966 | 36700        | CG8157     | -1.86 | 0.000195 | 0.0291    |
| A_09_P012626 | 45398        | Aldh-III   | -1.83 | 5.3e-06  | 0.00472   |
| A_09_P012871 | 46234        | fbl        | -1.82 | 0.000151 | 0.0267    |
| A_09_P189195 | 43892        | sif        | -1.82 | 3.64e-05 | 0.0151    |
| A_09_P063536 | 50239        | CG13235    | -1.79 | 0.000327 | 0.0403    |
| A_09_P021656 | 34447        | CG7384     | -1.78 | 7.87e-05 | 0.0205    |
| A_09_P197250 | 40273        | CG32425    | -1.74 | 0.00013  | 0.0253    |

## Sheet1

|              |         |           |        |          |        |
|--------------|---------|-----------|--------|----------|--------|
| A_09_P042626 | 33172   | Gs1       | -1.73  | 0.000254 | 0.034  |
| A_09_P010076 | 31939   | Yp1       | -1.71  | 0.000365 | 0.0429 |
| A_09_P042821 | 42852   | Hsp68     | -1.7   | 8e-05    | 0.0205 |
| A_09_P178020 | 5740638 | CR41610   | -1.68  | 0.000164 | 0.0273 |
| A_09_P076656 | 3771960 | waw       | -1.66  | 0.000276 | 0.0361 |
| A_09_P040561 | 32962   | CG14222   | -1.65  | 0.000343 | 0.0416 |
| A_09_P046696 | 5740691 | CG41265   | -1.62  | 0.000402 | 0.0456 |
| A_09_P125465 | 39675   | Eip71CD   | -1.62  | 4.46e-05 | 0.0159 |
| A_09_P071756 | 43104   | CG4774    | -1.6   | 3.84e-05 | 0.0152 |
| A_09_P069671 | 42462   | CG17270   | -1.6   | 0.000189 | 0.0287 |
| A_09_P025456 | 37248   | CG15120   | -1.58  | 0.000294 | 0.0377 |
| A_09_P006611 | 36276   | CG13188   | -1.58  | 0.000188 | 0.0287 |
| A_09_P064231 | 117347  | Gr39b     | -1.56  | 4.07e-05 | 0.0158 |
| A_09_P027746 | 37980   | Ance-5    | -1.55  | 0.00021  | 0.0304 |
| A_09_P014846 | 317902  | CG32189   | -1.54  | 4.01e-05 | 0.0158 |
| A_09_P141770 | 318102  | beltless  | -1.54  | 0.000195 | 0.0291 |
| A_09_P060021 | 40567   | CG31522   | -1.53  | 0.000102 | 0.0231 |
| A_09_P070621 | 42762   | CG4408    | -1.53  | 0.000399 | 0.0454 |
| A_09_P018751 | 33483   | CG18557   | -1.44  | 0.000242 | 0.0332 |
| A_09_P030021 | 36753   | Strn-Mlck | -1.43  | 5.11e-05 | 0.0169 |
| A_09_P028356 | 38186   | CG13917   | -1.42  | 2.11e-05 | 0.0108 |
| A_09_P023176 | 35115   | Cyp310a1  | -1.42  | 0.000138 | 0.0253 |
| A_09_P020016 | 33907   | CG9542    | -1.41  | 0.000105 | 0.0232 |
| A_09_P077281 | 31258   | CG2681    | -1.38  | 5.89e-05 | 0.0182 |
| A_09_P041151 | 40444   | Act79B    | -1.35  | 7.66e-05 | 0.0205 |
| A_09_P037846 | 32128   | CG9360    | -1.34  | 4.56e-05 | 0.0161 |
| A_09_P008666 | 36955   | CG4802    | -1.29  | 4.45e-05 | 0.0159 |
| A_09_P046641 | 43828   | CaMKII    | -1.28  | 9.71e-05 | 0.0225 |
| A_09_P123760 | 36927   | GstS1     | -1.25  | 0.000199 | 0.0295 |
| A_09_P075821 | 41994   | CG14882   | -1.25  | 0.000165 | 0.0273 |
| A_09_P028561 | 38243   | CG12024   | -1.25  | 0.000322 | 0.0401 |
| A_09_P050761 | 39293   | Mob2      | -1.24  | 6e-05    | 0.0183 |
| A_09_P028771 | 38323   | CG16985   | -1.23  | 0.000446 | 0.0482 |
| A_09_P009441 | 37217   | CG7461    | -1.2   | 0.000286 | 0.0368 |
| A_09_P041326 | 39041   | Argk      | -1.19  | 2.66e-05 | 0.0123 |
| A_09_P008946 | 37054   | CG5770    | -1.17  | 0.000236 | 0.0326 |
| A_09_P073136 | 41167   | SpdS      | -1.16  | 0.000385 | 0.0441 |
| A_09_P007091 | 36425   | CG17019   | -1.13  | 0.000466 | 0.0493 |
| A_09_P061066 | 43513   | CG7837    | -1.12  | 0.000114 | 0.0232 |
| A_09_P146045 | 36307   | Oda       | -1.11  | 0.000386 | 0.0441 |
| A_09_P217395 | 39301   | CG7368    | -1.04  | 0.000429 | 0.0471 |
| A_09_P035926 | 40522   | CG12581   | -1.02  | 8.21e-05 | 0.0206 |
| A_09_P148450 | 40623   | CG2604    | -0.993 | 0.000471 | 0.0495 |
| A_09_P164245 | 39854   | CG4098    | 0.827  | 0.000349 | 0.0422 |
| A_09_P005901 | 36034   | CG15863   | 0.899  | 0.00045  | 0.0482 |
| A_09_P064946 | 34191   | CG17834   | 0.91   | 0.000464 | 0.0492 |
| A_09_P053486 | 38805   | CG8607    | 1.03   | 0.00044  | 0.048  |
| A_09_P016761 | 31491   | CG33080   | 1.04   | 0.000139 | 0.0253 |
| A_09_P064596 | 59212   | CG18854   | 1.09   | 0.000296 | 0.0377 |
| A_09_P057906 | 37595   | CG30196   | 1.1    | 0.000342 | 0.0416 |
| A_09_P079806 | 40713   | CG2082    | 1.1    | 0.000373 | 0.0432 |
| A_09_P037381 | 31989   | CG2124    | 1.1    | 0.000122 | 0.0244 |
| A_09_P050431 | 36001   | dap       | 1.1    | 0.000164 | 0.0273 |
| A_09_P101040 | 3355150 | AGO3      | 1.13   | 0.000372 | 0.0432 |
| A_09_P076441 | 41643   | Lip3      | 1.14   | 0.000336 | 0.0411 |
| A_09_P115935 | 40324   | CG10584   | 1.15   | 0.000114 | 0.0232 |
| A_09_P024196 | 3355132 | CG14464   | 1.16   | 8.38e-05 | 0.0208 |

## Sheet1

|              |         |            |      |          |         |
|--------------|---------|------------|------|----------|---------|
| A_09_P036041 | 40553   | Cont       | 1.16 | 0.000371 | 0.0432  |
| A_09_P057671 | 246460  | CG30108    | 1.16 | 2.2e-05  | 0.0109  |
| A_09_P023066 | 35082   | CG15152    | 1.16 | 5.44e-05 | 0.0174  |
| A_09_P005601 | 35928   | CG11784    | 1.18 | 0.000363 | 0.0429  |
| A_09_P070756 | 42800   | CG10232    | 1.18 | 0.00014  | 0.0254  |
| A_09_P020106 | 33941   | Tsp        | 1.24 | 0.000188 | 0.0287  |
| A_09_P131640 | 34282   | GlcAT-S    | 1.26 | 0.000421 | 0.0464  |
| A_09_P069101 | 42294   | Cyp12a4    | 1.26 | 0.000403 | 0.0456  |
| A_09_P179200 | 3772557 | pncr012:2L | 1.28 | 0.000105 | 0.0232  |
| A_09_P067391 | 31512   | CG15766    | 1.28 | 0.000363 | 0.0429  |
| A_09_P034306 | 40035   | Sgf11      | 1.3  | 0.000175 | 0.0279  |
| A_09_P030951 | 40909   | alpha-Est1 | 1.33 | 0.00045  | 0.0482  |
| A_09_P044831 | 32498   | sog        | 1.37 | 0.000136 | 0.0253  |
| A_09_P066201 | 35932   | CG8788     | 1.38 | 0.000145 | 0.0259  |
| A_09_P060431 | 261623  | CG31683    | 1.41 | 0.000124 | 0.0246  |
| A_09_P057496 | 246425  | CG30059    | 1.43 | 0.000421 | 0.0464  |
| A_09_P045401 | 41520   | Cyp9f2     | 1.45 | 0.000235 | 0.0326  |
| A_09_P024241 | 35498   | TpnC4      | 1.48 | 0.000113 | 0.0232  |
| A_09_P030091 | 34615   | Rh5        | 1.48 | 0.00011  | 0.0232  |
| A_09_P166370 | 3771992 | pncr016:2R | 1.51 | 2.13e-06 | 0.00344 |
| A_09_P012691 | 44155   | Sip1       | 1.57 | 0.000102 | 0.0231  |
| A_09_P030841 | 35939   | Rme-8      | 1.57 | 9.1e-05  | 0.0218  |
| A_09_P007936 | 36689   | CG8079     | 1.64 | 1.32e-05 | 0.00787 |
| A_09_P070466 | 42711   | Or94a      | 1.67 | 2.06e-05 | 0.0107  |
| A_09_P004541 | 5740130 | CG34454    | 1.68 | 0.000159 | 0.0271  |
| A_09_P069096 | 42293   | Cyp12a5    | 1.69 | 0.000194 | 0.0291  |
| A_09_P025806 | 37341   | CG11159    | 1.69 | 0.000408 | 0.0458  |
| A_09_P058466 | 246614  | CG30438    | 1.71 | 0.00011  | 0.0232  |
| A_09_P032156 | 33119   | mst        | 1.72 | 8.01e-06 | 0.00582 |
| A_09_P189040 | 39917   | rogdi      | 1.73 | 0.000311 | 0.0393  |
| A_09_P059616 | 43177   | CG31324    | 1.81 | 1.78e-05 | 0.00995 |
| A_09_P115030 | 53542   | lectin-28C | 1.82 | 3.08e-05 | 0.0137  |
| A_09_P029071 | 38409   | dro5       | 1.88 | 0.00013  | 0.0253  |
| A_09_P062061 | 3355163 | Rab21      | 1.93 | 3.43e-05 | 0.0145  |
| A_09_P005791 | 36000   | CG10459    | 1.96 | 0.000475 | 0.0497  |
| A_09_P053926 | 38946   | CG17352    | 1.98 | 0.000247 | 0.0334  |
| A_09_P000061 | 3346224 | CG33510    | 2.01 | 1.91e-05 | 0.0101  |
| A_09_P192235 | 35417   | CG2201     | 2.02 | 6.46e-05 | 0.0188  |
| A_09_P180825 | 36399   | Obp49a     | 2.03 | 0.000217 | 0.0309  |
| A_09_P063896 | 50442   | CG14933    | 2.04 | 7.95e-05 | 0.0205  |
| A_09_P002196 | 2768859 | CG33226    | 2.06 | 0.000132 | 0.0253  |
| A_09_P216565 | 37572   | CG6018     | 2.09 | 3.43e-06 | 0.00392 |
| A_09_P211320 | 50320   | dpr12      | 2.1  | 8.14e-05 | 0.0205  |
| A_09_P001201 | 3885601 | CG34054    | 2.17 | 0.000137 | 0.0253  |
| A_09_P035476 | 40381   | CG7529     | 2.17 | 0.000299 | 0.0381  |
| A_09_P053601 | 38840   | Cyp316a1   | 2.25 | 1.72e-06 | 0.00344 |
| A_09_P194045 | 32977   | CG14224    | 2.25 | 0.000133 | 0.0253  |
| A_09_P137955 | 33863   | stai       | 2.26 | 2.41e-05 | 0.0113  |
| A_09_P077386 | 31102   | CG14780    | 2.3  | 6.2e-05  | 0.0184  |
| A_09_P044706 | 31617   | shf        | 2.39 | 3.77e-05 | 0.0152  |
| A_09_P008366 | 36840   | CG4409     | 2.39 | 0.000175 | 0.0279  |
| A_09_P072971 | 41116   | CG18473    | 2.4  | 6.43e-05 | 0.0188  |
| A_09_P025156 | 35821   | Cyp4ad1    | 2.42 | 1.02e-05 | 0.00661 |
| A_09_P042701 | 44008   | Hex-C      | 2.52 | 6.55e-05 | 0.0188  |
| A_09_P106615 | 40675   | CRMP       | 2.53 | 2.13e-06 | 0.00344 |
| A_09_P032616 | 33636   | Atet       | 2.53 | 0.000101 | 0.023   |
| A_09_P025186 | 35837   | Cyp6a13    | 2.54 | 1.88e-05 | 0.0101  |

## Sheet1

|              |        |         |      |          |          |
|--------------|--------|---------|------|----------|----------|
| A_09_P104310 | 44038  | Hf      | 2.56 | 2.01e-06 | 0.00344  |
| A_09_P014181 | 319045 | CG31955 | 2.64 | 0.000235 | 0.0326   |
| A_09_P063466 | 50207  | CG15065 | 2.64 | 0.000154 | 0.0268   |
| A_09_P077236 | 31086  | CG3056  | 2.73 | 0.000125 | 0.0246   |
| A_09_P009261 | 37165  | Mctp    | 2.77 | 5.49e-08 | 0.000798 |
| A_09_P032981 | 41313  | Sodh-2  | 2.78 | 4.44e-05 | 0.0159   |
| A_09_P029611 | 35767  | Odc2    | 2.92 | 8.14e-05 | 0.0205   |
| A_09_P137330 | 32858  | Cyp18a1 | 2.93 | 0.000312 | 0.0393   |
| A_09_P035096 | 40263  | CG11796 | 2.97 | 3.3e-06  | 0.00388  |
| A_09_P045756 | 34761  | Tehao   | 3.04 | 7.05e-06 | 0.00559  |
| A_09_P011886 | 48336  | GstD3   | 3.12 | 3.44e-08 | 0.000798 |
| A_09_P020721 | 34131  | CG8086  | 3.16 | 5.68e-06 | 0.00496  |
| A_09_P019531 | 33756  | Cyp4ac3 | 3.24 | 5.27e-06 | 0.00472  |
| A_09_P044531 | 34570  | sala    | 3.51 | 8.62e-07 | 0.00273  |
| A_09_P016781 | 42654  | CG33093 | 3.6  | 8.33e-07 | 0.00273  |
| A_09_P036596 | 40728  | CG1213  | 3.63 | 2.3e-05  | 0.011    |
| A_09_P054741 | 39225  | Cpr67Fb | 3.65 | 7.75e-05 | 0.0205   |
| A_09_P193360 | 34144  | CG14275 | 3.76 | 3.23e-06 | 0.00388  |
| A_09_P007281 | 36486  | IM10    | 4.03 | 0.000103 | 0.0232   |
| A_09_P177575 | 36636  | AttA    | 4.18 | 0.000178 | 0.0282   |
| A_09_P055541 | 39466  | CG12520 | 4.19 | 1.73e-06 | 0.00344  |
| A_09_P040846 | 33047  | CG1702  | 4.75 | 9.96e-05 | 0.0229   |
| A_09_P031136 | 45556  | Cyp6a17 | 5.3  | 1.87e-05 | 0.0101   |
| A_09_P018246 | 33312  | CG42329 | 5.36 | 1.56e-06 | 0.00344  |
| A_09_P007261 | 36481  | CG10814 | 6.71 | 4.33e-05 | 0.0159   |
