# Supplementary material for: Mondo/ChREBP-Mlx-Regulated Transcriptional Network Is Essential for Dietary Sugar Tolerance in Drosophila
Source: PubMed Central journal article supplement (PMC3616910; doi:10.1371/journal.pgen.1003438), 2013-04-04
Supplement: pgen.1003438.s008.pdf [file pgen.1003438.s008.pdf]

**Supplemental table 2.**

| CG number | gene                                | logFC  | adj.P. Val | human ortholog (from Flybase)                        | tub-GAL4> phenotype in yeast vs. yeast+15% sucrose | RNAi lines tested   |
|-----------|-------------------------------------|--------|------------|------------------------------------------------------|----------------------------------------------------|---------------------|
| CG4427    | cabut                               | -4.024 | 0.004      | Kruppel-like factor 12                               | sugar sensitive *)                                 | 4427 R-1 NIG        |
| CG3368    | CG3368                              | -3.934 | 0.003      | -                                                    | no phenotype                                       | 26177 GD            |
| CG7231    | CG7231                              | -3.895 | 0.001      | family with sequence similarity 151, member B        | N/D                                                |                     |
| CG1944    | Cyp4p2                              | -3.871 | 0.004      | -                                                    | no phenotype                                       | 1498 GD             |
| CG1600    | CG1600                              | -3.75  | 0.016      | -                                                    | no phenotype                                       | 108325 KK           |
| CG17642   | mitochondrial ribosomal protein L48 | -3.7   | 0.004      | mitochondrial ribosomal protein L48                  | larval lethal                                      | 107308 KK           |
| CG3348    | CG3348                              | -3.524 | 0.003      | -                                                    | no phenotype                                       | 8690 GD             |
| CG2043    | Larval cuticle protein 3            | -3.28  | 0.096      | -                                                    | larval lethal                                      | 107682 KK           |
| CG3609    | CG3609                              | -3.271 | 0.01       | dihydrodiol dehydrogenase                            | larval lethal                                      | 108742 KK           |
| CG12068   | shroud                              | -3.051 | 0.023      | -                                                    | larval lethal                                      | 50112 GD, 16388 GD  |
| CG1774    | CG1774                              | -3.05  | 0.266      | -                                                    | no phenotype                                       | 101033 KK           |
| CG34301   | CG34301                             | -2.891 | 0.011      | -                                                    | embryonic lethal                                   | 105343 KK           |
| CG15347   | CG15347                             | -2.88  | 0.01       | -                                                    | no phenotype                                       | 107479 KK           |
| CG3705    | astray                              | -2.80  | 0.118      | phosphoserine phosphatase                            | pupal lethal/no phenotype                          | 110661 KK           |
| CG6426    | CG6426                              | -2.779 | 0.017      | -                                                    | N/D                                                |                     |
| CG34141   | CG34141                             | -2.714 | 0.004      | -                                                    | N/D                                                |                     |
| CG2044    | Larval cuticle protein 4            | -2.70  | 0.308      | -                                                    | pupal lethal/no phenotype                          | 105025 KK           |
| CG15257   | Translocase inner membrane 17       | -2.697 | 0.018      | -                                                    | no phenotype                                       | 3837 GD             |
| CG6074    | CG6074                              | -2.66  | 0.073      | -                                                    | pupal lethal/no phenotype                          | 31138 GD            |
| CG8936    | Arpc3B                              | -2.65  | 0.043      | -                                                    | N/D                                                |                     |
| CG8256    | Glycerophosphate oxidase-1          | -2.61  | 0.296      | glycerol-3-phosphate dehydrogenase 2 (mitochondrial) | pupal lethal/no phenotype                          | 110608 KK           |
| CG17322   | CG17322                             | -2.556 | 0.005      | -                                                    | embryonic lethal                                   | 110057 KK           |
| CG32019   | bent                                | -2.528 | 0.012      | -                                                    | N/D                                                |                     |
| CG15117   | CG15117                             | -2.53  | 0.495      | glucuronidase, beta                                  | pupal lethal/no phenotype                          | 108570 KK           |
| CG8628    | CG8628                              | -2.46  | 0.608      | -                                                    | larval lethal                                      | 110103 KK           |
| CG9042    | Glycerol 3 phosphate dehydrogenase  | -2.46  | 0.007      | glycerol-3-phosphate dehydrogenase 1                 | larval lethal                                      | 105359 KK, 29015 GD |

|         |                                    |        |       |                                                                     |                           |           |
|---------|------------------------------------|--------|-------|---------------------------------------------------------------------|---------------------------|-----------|
| CG9432  | lethal (2) 01289                   | -2.44  | 0.022 | -                                                                   | embryonic lethal          | 107350 KK |
| CG34397 | Rgk3                               | -2.426 | 0.016 | RAS (RAD and GEM)-like GTP-binding 1                                | no phenotype              | 106428 KK |
| CG32490 | complexin                          | -2.40  | 0.057 | -                                                                   | no phenotype              | 21477 GD  |
| CG8034  | CG8034                             | -2.326 | 0.011 | -                                                                   | larval lethal             | 106660 KK |
| CG7675  | CG7675                             | -2.324 | 0.023 | -                                                                   | larval lethal             | 107833 KK |
| CG10079 | Epidermal growth factor receptor   | -2.31  | 0.151 | v-erb-b2 erythroblastic leukemia viral oncogene homolog 3 (avian)   | pupal lethal/no phenotype | 107130 KK |
| CG11129 | Yolk protein 3                     | -2.29  | 0.317 | -                                                                   | pupal lethal/no phenotype | 46787 GD  |
| CG5773  | CG5773                             | -2.266 | 0.021 | -                                                                   | no phenotype              | 106345 KK |
| CG8709  | CG8709                             | -2.183 | 0.048 | lipin 3                                                             | larval lethal             | 36007 GD  |
| CG4563  | CG4563                             | -2.12  | 0.649 | -                                                                   | no phenotype              | 101849 KK |
| CG13741 | CG13741                            | -2.12  | 0.021 | -                                                                   | N/D                       |           |
| CG18255 | Stretchin-Mlck                     | -2.114 | 0.03  | -                                                                   | N/D                       |           |
| CG9930  | E5                                 | -2.09  | 0.025 | -                                                                   | no phenotype              | 47794 GD  |
| CG7478  | Actin 79B                          | -2.077 | 0.025 | -                                                                   | N/D                       |           |
| CG2139  | aralar1                            | -2.044 | 0.017 | solute carrier family 25 (mitochondrial carrier, Aralar), member 12 | N/D                       |           |
| CG11236 | CG11236                            | -2.043 | 0.016 | -                                                                   | no phenotype              | 38460 GD  |
| CG17608 | fu12                               | -1.99  | 0.068 | -                                                                   | no phenotype              | 108540 KK |
| CG10699 | Lim3                               | -1.987 | 0.006 | LIM homeobox 3                                                      | pupal lethal/no phenotype | 105746 KK |
| CG5991  | CG5991                             | -1.974 | 0.025 | phosphatidylserine decarboxylase                                    | larval lethal             | 109033 KK |
| CG12946 | Whamy                              | -1.97  | 0.046 | -                                                                   | N/D                       |           |
| CG34288 | CG34288                            | -1.966 | 0.031 | -                                                                   | N/D                       |           |
| CG6933  | CG6933                             | -1.96  | 0.737 | -                                                                   | no phenotype              | 104107 KK |
| CG5170  | Dodeca-satellite-binding protein 1 | -1.955 | 0.004 | high density lipoprotein binding protein                            | no phenotype              | 106047 KK |
| CG6357  | CG6357                             | -1.939 | 0.019 | -                                                                   | N/D                       |           |
| CG5887  | desat1                             | -1.907 | 0.016 | stearoyl-CoA desaturase (delta-9-desaturase)                        | embryonic lethal          | 104350 KK |
| CG30463 | CG30463                            | -1.883 | 0.019 | -                                                                   | pupal lethal/no phenotype | 4923 GD   |
| CG11140 | Aldehyde dehydrogenase type III    | -1.843 | 0.008 | aldehyde dehydrogenase 3 family, member B1                          | sugar sensitive           | 107110 KK |
| CG5725  | fumble                             | -1.823 | 0.027 | pantothenate kinase 1                                               | no phenotype              | 101437 KK |
| CG34418 | still life                         | -1.821 | 0.015 | -                                                                   | no phenotype              | 106832 KK |
| CG12665 | Odorant-binding protein 8a         | -1.81  | 0.161 | -                                                                   | no phenotype              | 47798 GD  |
| CG8665  | CG8665                             | -1.79  | 0.155 | aldehyde dehydrogenase 1 family, member L1                          | no phenotype              | 36000 GD  |

|         |                                            |        |       |                                                              |                           |           |
|---------|--------------------------------------------|--------|-------|--------------------------------------------------------------|---------------------------|-----------|
| CG15553 | CG15553                                    | -1.79  | 0.343 | -                                                            | pupal lethal/no phenotype | 104514 KK |
| CG15361 | Neuropeptide-like precursor 4              | -1.79  | 0.411 | -                                                            | no phenotype              | 104662 KK |
| CG7384  | CG7384                                     | -1.78  | 0.021 | -                                                            | N/D                       |           |
| CG10242 | Cyp6a23                                    | -1.75  | 0.246 | -                                                            | no phenotype              | 100679 KK |
| CG2718  | Glutamine synthetase 1                     | -1.728 | 0.034 | -                                                            | no phenotype              | 40174 GD  |
| CG13277 | LSm7                                       | -1.727 | 0.003 | -                                                            | larval lethal             | 23863 GD  |
| CG3879  | Multi drug resistance 49                   | -1.72  | 0.135 | -                                                            | no phenotype              | 108327 KK |
| CG2985  | Yolk protein 1                             | -1.708 | 0.043 | -                                                            | larval lethal             | 106735 KK |
| CG5436  | Heat shock protein 68                      | -1.703 | 0.021 | -                                                            | pupal lethal/no phenotype | 107356 KK |
| CG1242  | Heat shock protein 83                      | -1.70  | 0.334 | heat shock protein 90kDa alpha (cytosolic), class A member 1 | larval lethal             | 108568 KK |
| CG7533  | charybde                                   | -1.69  | 0.099 | -                                                            | larval lethal             | 105757 KK |
| CG9447  | CG9447                                     | -1.68  | 0.082 | -                                                            | no phenotype              | 7342 GD   |
| CG14723 | Histamine-gated chloride channel subunit 1 | -1.66  | 0.652 | -                                                            | pupal lethal/no phenotype | 104966 KK |
| CG1410  | waclaw                                     | -1.658 | 0.036 | GUF1 GTPase homolog ( <i>S. cerevisiae</i> )                 | no phenotype              | 50569 GD  |
| CG17633 | CG17633                                    | -1.65  | 0.04  | -                                                            | no phenotype              | 108462 KK |
| CG14222 | CG14222                                    | -1.652 | 0.042 | N(alpha)-acetyltransferase 20, NatB catalytic subunit        | pupal lethal/no phenotype | 109664 KK |
| CG12116 | CG12116                                    | -1.65  | 0.082 | -                                                            | no phenotype              | 6498 GD   |
| CG11218 | Odorant-binding protein 56d                | -1.64  | 0.547 | -                                                            | no phenotype              | 100671 KK |
| CG17018 | CG17018                                    | -1.64  | 0.191 | -                                                            | no phenotype              | 106964 KK |
| CG31623 | defective transmitter release              | -1.64  | 0.279 | leucine rich repeat containing 50                            | no phenotype              | 103600 KK |
| CG31100 | CG31100                                    | -1.64  | 0.376 | -                                                            | no phenotype              | 42630 GD  |
| CG15120 | CG15120                                    | -1.628 | 0.043 | PARK2 co-regulated                                           | pupal lethal/no phenotype | 107946 KK |
| CG41265 | lethal (2) 41Ab                            | -1.622 | 0.046 | -                                                            | N/D                       |           |
| CG7266  | Ecdysone-induced protein 28/29kD           | -1.617 | 0.016 | methionine sulfoxide reductase A                             | no phenotype              | 104465 KK |
| CG4373  | Cyp6d2                                     | -1.61  | 0.15  | -                                                            | no phenotype              | 101829 KK |
| CG6186  | Transferrin 1                              | -1.60  | 0.06  | -                                                            | pupal lethal/no phenotype | 106479 KK |
| CG4774  | CG4774                                     | -1.598 | 0.015 | cardiolipin synthase 1                                       | larval lethal             | 108392 KK |
| CG17270 | CG17270                                    | -1.597 | 0.029 | -                                                            | pupal lethal/no phenotype | 106420 KK |
| CG13188 | CG13188                                    | -1.577 | 0.029 | -                                                            | larval lethal             | 102370 KK |
| CG18730 | Amylase proximal                           | -1.57  | 0.498 | amylase, alpha 2B (pancreatic)                               | no phenotype              | 50098 GD  |
| CG31522 | CG31522                                    | -1.566 | 0.025 | -                                                            | larval lethal             | 37329 GD  |
| CG31620 | Gustatory receptor 39b                     | -1.563 | 0.016 | -                                                            | no phenotype              | 33215 GD  |
| CG4830  | CG4830                                     | -1.56  | 0.674 | -                                                            | no phenotype              | 21633 GD  |
| CG10142 | Ance-5                                     | -1.553 | 0.03  | -                                                            | no phenotype              | 15246 GD  |

|         |                                                |        |       |                                                      |                           |           |
|---------|------------------------------------------------|--------|-------|------------------------------------------------------|---------------------------|-----------|
| CG8896  | 18 wheeler                                     | -1.54  | 0.098 | -                                                    | no phenotype              | 44387 GD  |
| CG33968 | drop dead                                      | -1.54  | 0.029 | -                                                    | no phenotype              | 103032 KK |
| CG11094 | doublesex                                      | -1.53  | 0.781 | DMRT-like family B with proline-rich C-terminal, 1   | larval lethal             | 110306 KK |
| CG4408  | CG4408                                         | -1.526 | 0.045 | -                                                    | no phenotype              | 15235 GD  |
| CG5804  | CG5804                                         | -1.53  | 0.439 | -                                                    | no phenotype              | 23587 GD  |
| CG17633 | CG17633                                        | -1.52  | 0.289 | -                                                    | no phenotype              | 108462 KK |
| CG1641  | sisterless A                                   | -1.52  | 0.438 | -                                                    | no phenotype              | 11797 GD  |
| CG18557 | CG18557                                        | -1.44  | 0.033 | -                                                    | no phenotype              | 107357 KK |
| CG13917 | CG13917                                        | -1.424 | 0.011 | -                                                    | larval lethal             | 32082 GD  |
| CG10391 | Cyp310a1                                       | -1.424 | 0.025 | -                                                    | no phenotype              | 100318 KK |
| CG9542  | CG9542                                         | -1.408 | 0.025 | arylformamidase                                      | embryonic lethal          | 109675 KK |
| CG2681  | CG2681                                         | -1.376 | 0.018 | -                                                    | no phenotype              | 110791 KK |
| CG9360  | CG9360                                         | -1.341 | 0.016 | dehydrogenase/reductase (SDR family) member 11       | no phenotype              | 13189 GD  |
| CG4802  | CG4802                                         | -1.293 | 0.016 | methylthioadenosine phosphorylase                    | no phenotype              | 108304 KK |
| CG18069 | Calcium/calmodulin-dependent protein kinase II | -1.282 | 0.023 | calcium/calmodulin-dependent protein kinase II delta | no phenotype              | 100265 KK |
| CG1725  | discs large 1                                  | -1.281 | 0.021 | discs, large homolog 1 (Drosophila)                  | no phenotype              | 109274 KK |
| CG14882 | CG14882                                        | -1.266 | 0.033 | -                                                    | larval lethal             | 103984 KK |
| CG8938  | Glutathione S transferase S1                   | -1.252 | 0.029 | hematopoietic prostaglandin D synthase               | larval lethal             | 50140 GD  |
| CG12024 | CG12024                                        | -1.249 | 0.04  | CUE domain containing 1                              | no phenotype              | 20143 GD  |
| CG16985 | CG16985                                        | -1.232 | 0.048 | acyl-CoA thioesterase 13                             | no phenotype              | 107909 KK |
| CG7461  | CG7461                                         | -1.212 | 0.043 | acyl-CoA dehydrogenase, very long chain              | no phenotype              | 110220 KK |
| CG32031 | Arginine kinase                                | -1.204 | 0.03  | creatine kinase, brain                               | larval lethal             | 34036 GD  |
| CG5770  | CG5770                                         | -1.174 | 0.033 | -                                                    | N/D                       |           |
| CG8327  | Spermidine Synthase                            | -1.173 | 0.05  | spermidine synthase                                  | no phenotype              | 10877 KK  |
| CG17019 | CG17019                                        | -1.131 | 0.049 | ring finger protein 34                               | no phenotype              | 48749 GD  |
| CG7837  | CG7837                                         | -1.123 | 0.023 | -                                                    | no phenotype              | 109784 KK |
| CG16747 | Ornithine decarboxylase antizyme               | -1.106 | 0.044 | ornithine decarboxylase antizyme 3                   | N/D                       |           |
| CG7368  | CG7368                                         | -1.038 | 0.047 | -                                                    | pupal lethal/no phenotype | 109515 KK |
