# Supplementary material for: Mondo/ChREBP-Mlx-Regulated Transcriptional Network Is Essential for Dietary Sugar Tolerance in Drosophila
Source: PubMed Central journal article supplement (PMC3616910; doi:10.1371/journal.pgen.1003438), 2013-04-04
Supplement: pgen.1003438.s009.pdf [file pgen.1003438.s009.pdf]

**Supplemental table 3.**

| <b>Gene</b>            | <b>Forward</b>         | <b>Reverse</b>        |
|------------------------|------------------------|-----------------------|
| <b><i>rp49</i></b>     | AGGGTATCGACAACAGAGTG   | CACCAGGAACCTTCTTGAATC |
| <b><i>actin</i></b>    | CCGTACCACAGGTATCGTGTTG | GTCGGTTAAATCGCGACCG   |
| <b><i>cabut</i></b>    | ATGCCTTCTCGCTCTCATGT   | TCCTGGAAAGAAGTGGCATC  |
| <b><i>Aldh-III</i></b> | GATCAAGCCCAGCGAGATT    | CGCAGACAACCTGGATAGCAA |
| <b><i>mondo</i></b>    | GCGGCGTTACAACATAAAGA   | CTCCATGCGCAAAGCTTCAA  |
| <b><i>mlx</i></b>      | GCCAAGTTTCAAGTGTTCCAG  | CTCCAGCCAGGGGATAATG   |
| <b><i>Fas</i></b>      | CTCCACCATCGAGGAGTTCA   | CTTGAGCTTGCCAATCCTGT  |
| <b><i>ACC</i></b>      | GGCTATGCTGCGCTTAACA    | GCCTCTGTTTTGTGGGTGAC  |
| <b><i>desat1</i></b>   | GCGCGCCGATCCAATCCTCA   | GGTGGCCACAAACCAGGCGT  |
| <b><i>Gs1</i></b>      | TTGTCCTGTGCGACACCTAC   | ATTCTTGCTCAATGCCGAAC  |
| <b><i>Gpdh</i></b>     | GCAAGCTGTCCACCTTCTTC   | CAGAAGTCACAAACGCCTCA  |
| <b><i>Gpo-1</i></b>    | AGATGGGACACTCGGTCAAC   | TGATGGAAACGTAGCCCTTC  |
| <b><i>PFK2</i></b>     | AGAGCGAGTACAACCTGAGC   | TAGCGCATTGGCATACTGGT  |
| <b><i>sro</i></b>      | TGCTGGAGTAATGTGCTTCG   | TCATGTGTCAGCCTCATGGT  |
